# Supplementary material
Source: PubMed Central journal article supplement (PMC6007886)
Supplement: NIHMS972117-supplement-supplement_1.pdf [file NIHMS972117-supplement-supplement_1.pdf]

Supplementary Table 1a.

|                | Proportion Under Detection Limits |             |        |             | Proportion With CV's > 20%* |            |        |            |
|----------------|-----------------------------------|-------------|--------|-------------|-----------------------------|------------|--------|------------|
|                | Plasma                            |             | CSF    |             | Plasma                      |            | CSF    |            |
| MIP-1 $\alpha$ | 0.58%                             | (n=1/172)   | 0.02%  | (n=3/173)   | 7.02%                       | (n=12/171) | 40.00% | (n=68/170) |
| MCP-4          | 0.00%                             | (n=0/172)   | 41.61% | (n=72/173)  | 0.00%                       | (n=0/172)  | 76.24% | (n=77/101) |
| Eotaxin-1      | 0.00%                             | (n=0/172)   | 0.03%  | (n=6/173)   | 0.00%                       | (n=0/172)  | 58.08% | (n=97/167) |
| MIP-1 $\beta$  | 0.00%                             | (n=0/172)   | 0.00%  | (n=0/173)   | 0.00%                       | (n=0/172)  | 0.00%  | (n=0/173)  |
| MCP-1          | 0.00%                             | (n=0/172)   | 0.00%  | (n=0/173)   | 0.58%                       | (n=1/172)  | 0.00%  | (n=0/173)  |
| Eotaxin-3      | 0.58%                             | (n=1/172)   | 5.02%  | (n=9/173)   | 1.17%                       | (n=2/171)  | 33.54% | (n=55/164) |
| IP-10          | 0.00%                             | (n=0/172)   | 0.00%  | (n=0/173)   | 0.58%                       | (n=1/172)  | 0.00%  | (n=0/173)  |
| MDC            | 0.00%                             | (n=0/172)   | 0.00%  | (n=0/173)   | 0.58%                       | (n=1/172)  | 33.53% | (n=58/173) |
| TARC           | 0.00%                             | (n=0/172)   | 0.10%  | (n=2/173)   | 0.00%                       | (n=0/172)  | 38.60% | (n=66/171) |
| IL-8           | 0.00%                             | (n=0/172)   | 0.00%  | (n=0/173)   | 0.00%                       | (n=0/172)  | 0.00%  | (n=0/173)  |
| IL-6           | 0.00%                             | (n=0/172)   | 0.00%  | (n=0/173)   | 3.49%                       | (n=6/172)  | 0.00%  | (n=0/173)  |
| IL-12P70       | 41.86%                            | (n=72/172)  | 54.91% | (n=95/173)  | 79.00%                      | (n=79/100) | 76.92% | (n=60/78)  |
| IL-2           | 32.56%                            | (n=56/172)  | 0.00%  | (n=0/173)   | 51.72%                      | (n=60/116) | 57.23% | (n=99/173) |
| Interferon-g   | 0.00%                             | (n=0/172)   | 33.53% | (n=58/173)  | 4.07%                       | (n=7/172)  | 63.48% | (n=73/115) |
| IL-13          | 61.62%                            | (n=106/172) | 72.25% | (n=125/173) | 57.58%                      | (n=38/66)  | 77.08% | (n=37/48)  |
| TNF- $\alpha$  | 0.00%                             | (n=0/172)   | 0.10%  | (n=2/173)   | 0.00%                       | (n=0/172)  | 46.20% | (n=79/171) |
| IL-4           | 67.44%                            | (n=116/172) | 56.07% | (n=97/173)  | 80.36%                      | (n=45/56)  | 71.05% | (n=54/76)  |
| IL-10          | 2.33%                             | (n=4/172)   | 0.00%  | (n=0/173)   | 7.74%                       | (n=13/168) | 44.51% | (n=77/173) |
| IL-1 $\beta$   | 95.93%                            | (n=165/172) | 48.55% | (n=84/173)  | 85.71%                      | (n=6/7)    | 73.03% | (n=65/89)  |

Note that one participant (186) has CSF but not plasma, resulting in 172 plasma and 173 CSF. Class separates cytokines: gray represents chemokines and blue represents interleukins, interferons and tumor necrosis factor.

Supplementary Table 1b.

| Analyte        | % Usable Data (CV cut off of 20%)<br>Mean(Standard Deviation) in pg/mL** |                         |
|----------------|--------------------------------------------------------------------------|-------------------------|
|                | Plasma                                                                   | CSF                     |
| MIP-1 $\alpha$ | 92.4%<br>11.1 (4.1)                                                      | 59.0%<br>4.8 (1.8)      |
| MCP-4          | 100.0%<br>454.1 (195.5)                                                  | 13.9%<br>-              |
| Eotaxin-1      | 100.0%<br>716.1 (294.9)                                                  | 40.5%<br>-              |
| MIP-1 $\beta$  | 100.0%<br>55.3 (18.0)                                                    | 100.0%<br>9.8 (3.3)     |
| MCP-1          | 99.4%<br>222.2 (53.8)                                                    | 100.0%<br>392.4 (102.7) |
| Eotaxin-3      | 98.3%<br>108.6 (49.8)                                                    | 63.0%<br>1.9 (0.7)      |
| IP-10          | 99.4%<br>393.7 (160.3)                                                   | 100.0%<br>363.3 (210.0) |
| MDC            | 99.4%<br>1028.3 (354.9)                                                  | 66.5%<br>11.3 (4.7)     |
| TARC           | 100.0%<br>60.4 (29.4)                                                    | 60.7%<br>1.8 (0.8)      |
| IL-8           | 100.0%<br>5.9 (2.0)                                                      | 100.0%<br>42.4 (11.0)   |
| IL-6           | 96.5%<br>0.6 (.3)                                                        | 100.0%<br>1.1 (.5)      |
| IL-12P70       | 12.2%<br>-                                                               | 10.4%<br>-              |
| IL-2           | 32.6%<br>-                                                               | 42.8%<br>-              |
| Interferon-g   | 95.9%<br>3.8 (2.5)                                                       | 24.3%<br>-              |
| IL-13          | 16.3%<br>-                                                               | 6.4%<br>-               |
| TNF- $\alpha$  | 100.0%<br>2.2 (0.7)                                                      | 53.2%<br>0.2 (0.1)      |
| IL-4           | 6.4%<br>-                                                                | 12.7%<br>-              |
| IL-10          | 90.1%<br>0.3 (0.1)                                                       | 55.5%<br>0.1 (0.1)      |
| IL-1 $\beta$   | 0.01%<br>-                                                               | 13.9%<br>-              |

\*\*Mean and Standard Deviation provided for markers in which detection was > 50%. Blue shading represents markers that were selected for analyses based on % usable data (as defined in Supplementary Table 1a).
